# Supplementary material
Source: PubMed Central journal article supplement (PMC3672874)

# Carbohydrate Recognition by RpfB from *Mycobacterium tuberculosis* Unveiled by Crystallographic and Molecular Dynamics Analyses

Flavia Squeglia,<sup>†‡</sup> Maria Romano,<sup>†§</sup> Alessia Ruggiero,<sup>†</sup> Luigi Vitagliano,<sup>†</sup> Alfonso De Simone,<sup>¶\*</sup> and Rita Berisio<sup>†\*</sup>

<sup>†</sup>Institute of Biostructures and Bioimaging, C.N.R., Naples, Italy; <sup>‡</sup>Department of Chemistry, University of Naples Federico II, Napoli, Italy; <sup>§</sup>Seconda Università di Napoli, Caserta, Italy; and <sup>¶</sup>Division of Molecular Biosciences, Imperial College London, United Kingdom

Squeglia et al.

Protein-Carbohydrate Interactions in RpfB

*Submitted February 21, 2013, and accepted for publication April 16, 2013.*

\*Correspondence: [a.de-simon@imperial.ac.uk](mailto:a.de-simon@imperial.ac.uk) or [rita.berisio@cnr.it](mailto:rita.berisio@cnr.it)

## Supplementary Information

### Supplementary Figure Legends

**Figure S1.** Localisation of strongest water sites in the MD simulation. (A) RpfBcat is represented in cartoon and water sites as balls. The water site W1 is indicated by an arrow. (B) RpfBcat is represented in surface representation. Water sites are defined as totally buried (TB), nearly totally buried (NTB) and solvent exposed (SE)

**Figure S2.** Flexibility of the complex between RpfB<sub>cat</sub> and NAG6. (A) RMSF values calculated for the backbone atoms of free (black) and NAG6-bound (red) RpfBcat. (B) Stick representation of NAG3 (orange, from x-ray structure) and NAG6 (light blue, from MD) after superposition of RpfBcat. (C) RMSF values computed on C1 atoms of NAG moieties in the subsites from -4 to +2. (D)  $\phi$ - $\psi$  distribution of glycosidic bonds between subsequent NAG moieties in the NAG6 molecule.  $\phi$  and  $\psi$  dihedral angles were defined by atoms O5-C1-O1-C4 and C1-O1-C4-C5, respectively.

### **Figure S3.**

Distributions of RMSD values from the starting structure, calculated on all atoms of NAG rings at positions from -4 to +2 (A to F, respectively).

**Figure S4.** (A) Domain organization and (B) sequence alignment. of the five Rpf homologs. The catalytic Glu292 (RpfB numbering) is reported in red, whereas conserved Gly residues are reported in blue.

**Figure S5.** (A) Consurf sequence alignment showing the conserved residues on the surface of RpfBcat. Residue coloring, reflecting the degree of residue conservation over the entire domain family, ranges from magenta (highly conserved) to cyan (variable). The identified homologues (using an E-value cutoff of 0.001, See Methods) include mainly Resuscitation Promoting Factors from different sources and transglycosydases. Key residues involved in hydrogen bonding with NAG6 in -3,-2 and -1 sites are reported in green, blue and red, respectively. (B) Degree of residue conservation mapped on RpfBcat surface.

**Figure S6.** W1 is partially covered by NAG3 in the crystal state (A) and becomes totally buried in the simulated complex between RpfBcat and NAG6 (B).

**Figure S7.** (A) Stick representation of the modeled muropeptide (NAG<sub>3</sub>NAM<sub>3</sub>Ala<sub>6</sub>Glu<sub>3</sub>DAP<sub>3</sub>) mapped on RpfB<sub>cat</sub> surface. (B) Top view of the complex.

**Figure S8.** Electrostatic potential surfaces of the five Rpfs (A-E). The sixth panel reports the computed pI values for the five domains and for the entire proteins.

Supplementary Figures

Figure S1

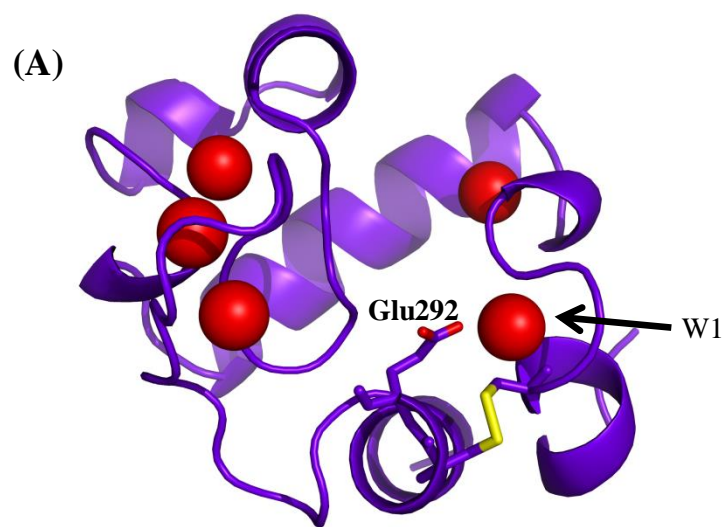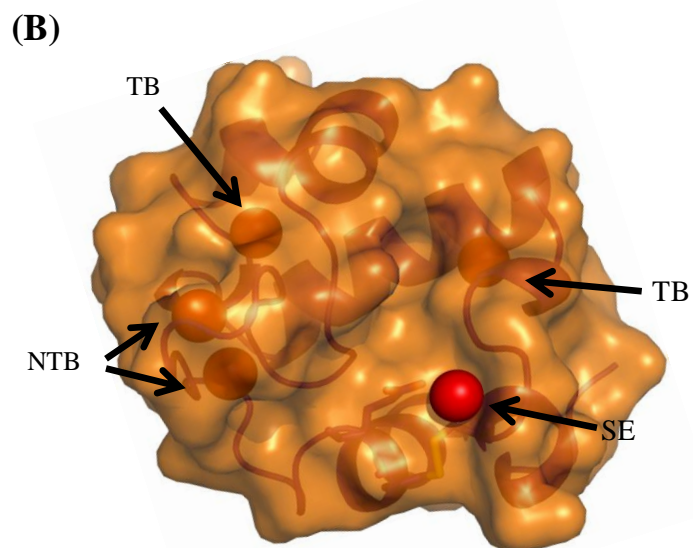

Figure S2

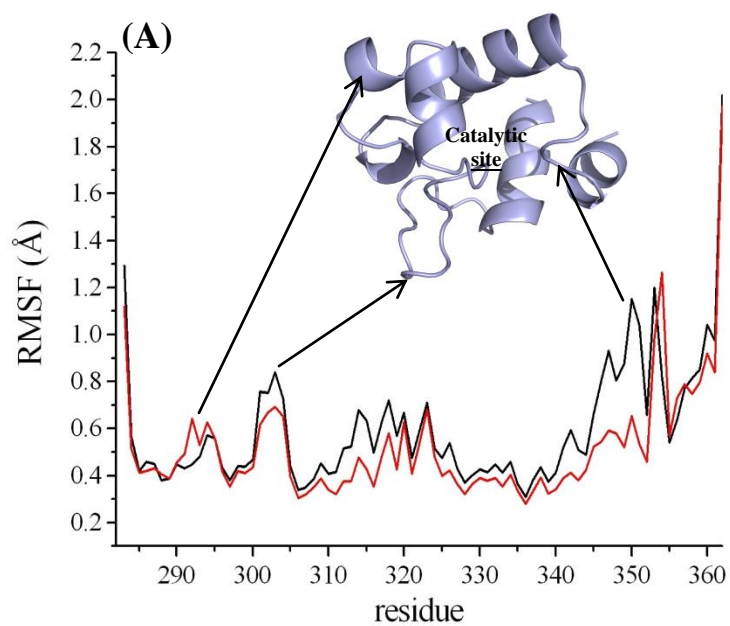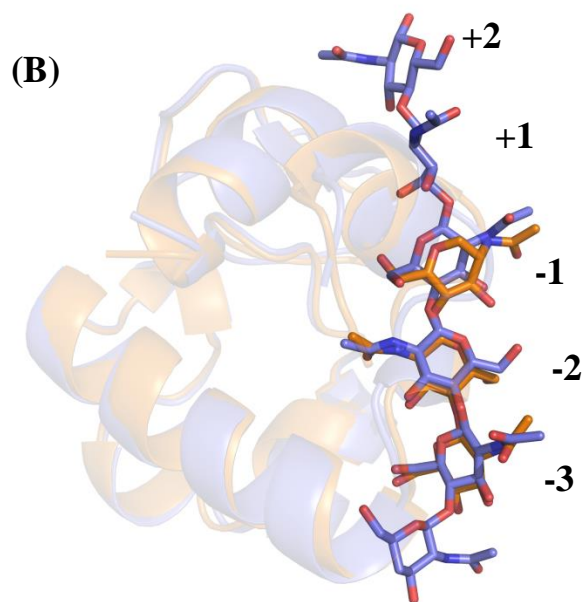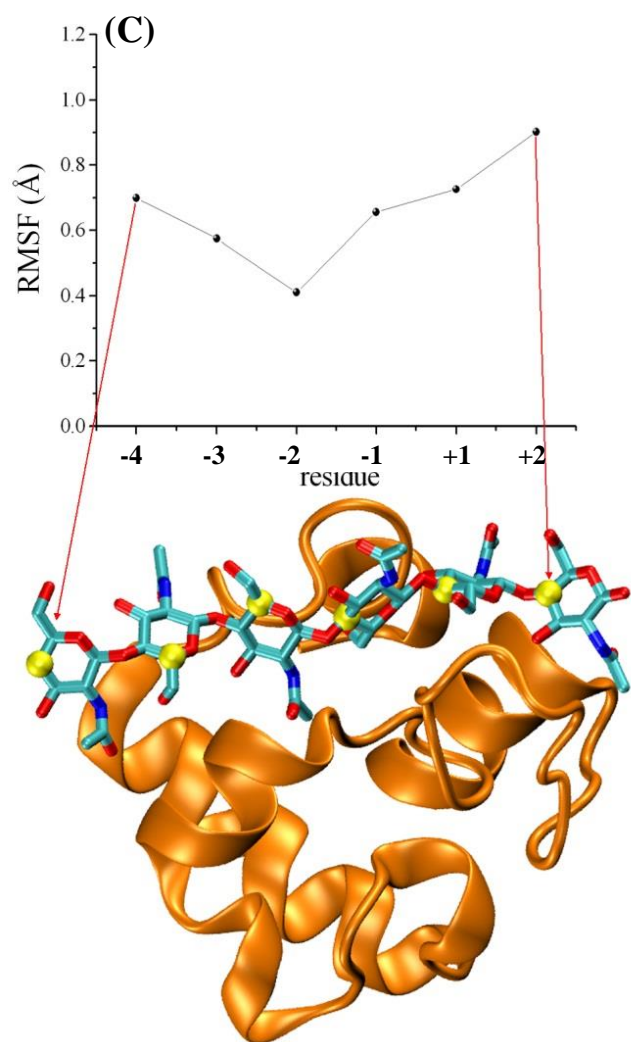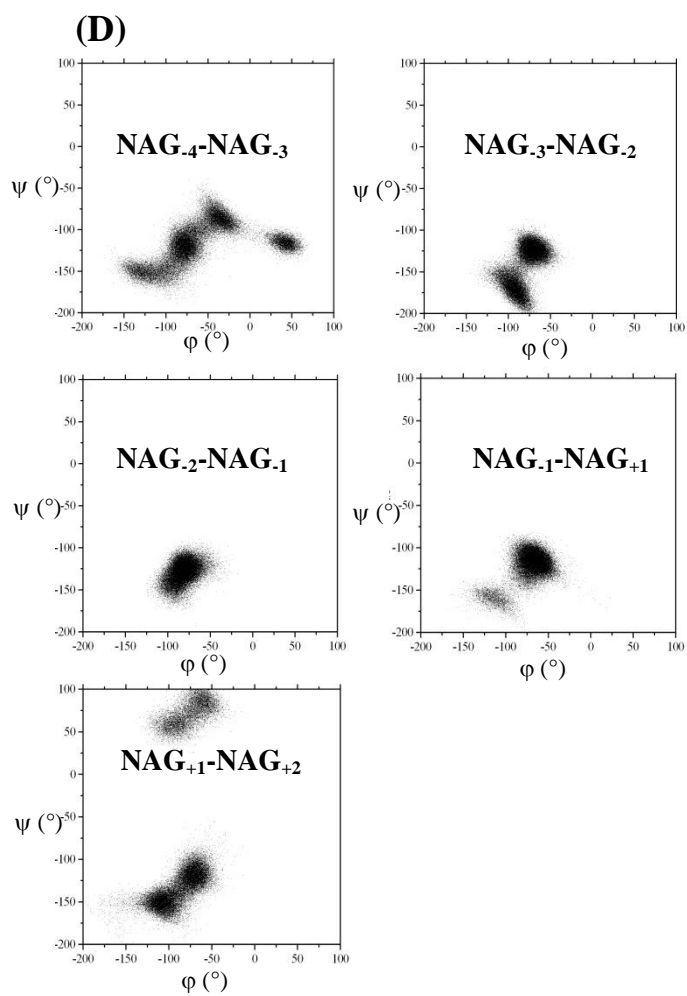

Figure S3

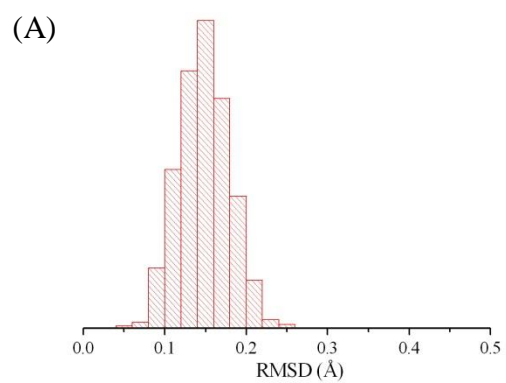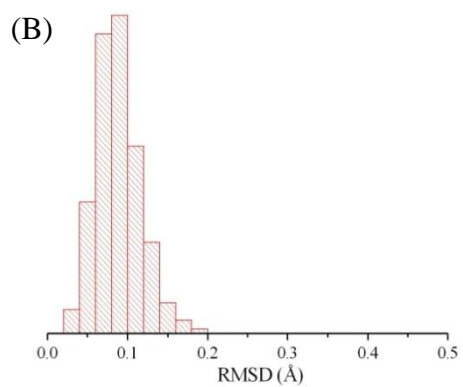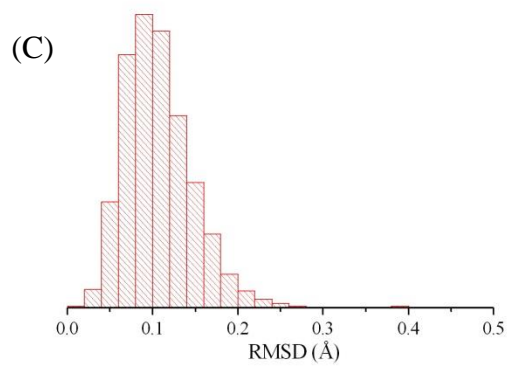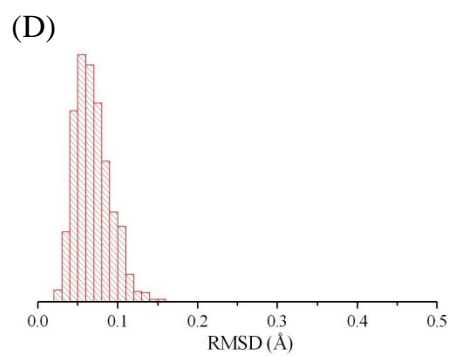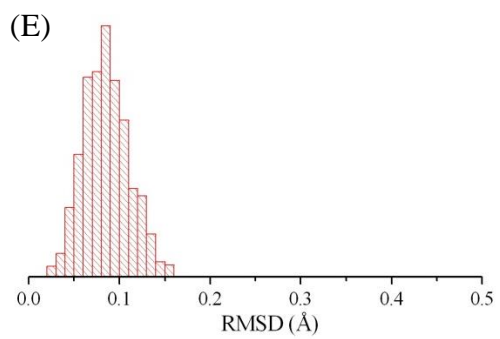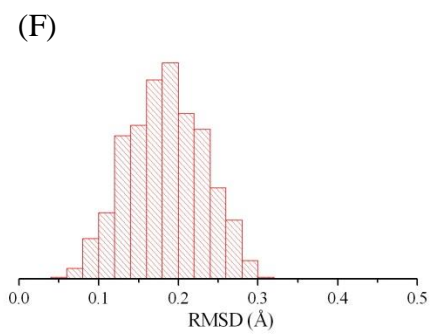

Figure S4

(A)

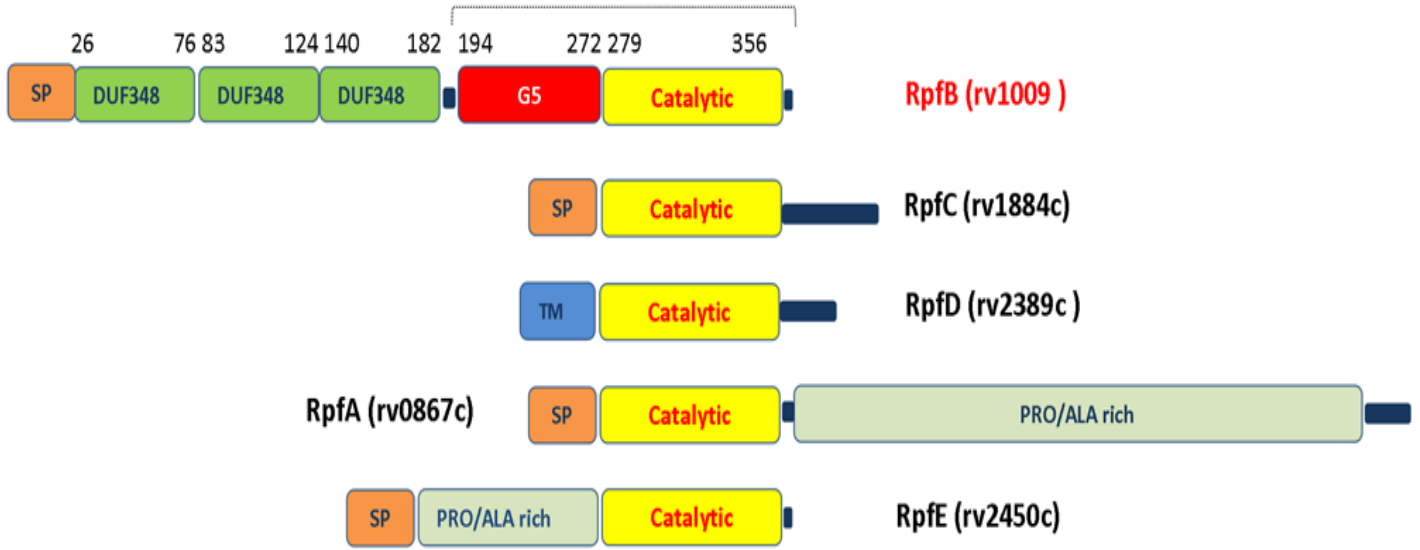

(B)

| Sequences of catalytic domains |                                                                                                                    |
|--------------------------------|--------------------------------------------------------------------------------------------------------------------|
| RpfA                           | GEWDQVARC <b>E</b> SGGNWSINT <b>G</b> NGYL <b>G</b> GLQFTQSTWAAH <b>G</b> GEFAPSAQLASREQQIAVGERVLATQGRGAWPVCGR-GL  |
| RpfB                           | SIWDAIAGC <b>E</b> AGGNWAIN <b>T</b> NGYY <b>G</b> GVQFDQGTWEAN <b>G</b> GLRYAPRADLATREEQIAVAQVTRLRQGWGAWPVCAA-RA  |
| RpfC                           | PNWDAVAQ <b>C</b> ESGGNWAANT <b>G</b> NGKY <b>G</b> GLQFKPATWAAF <b>G</b> GVGN---PAAASREQQIAVANRVLAEQGLDAWPTCGAA-S |
| RpfD                           | IDWDAIAQ <b>C</b> ESGGNWAANT <b>G</b> NGLY <b>G</b> GLQISQATWDSN <b>G</b> GVGS---PAAASPOQQIEVADNIMKTQGPWAWPKSSCSQ  |
| RpfE                           | VNWDIAAQ <b>C</b> ESGGNWSINT <b>G</b> NGYY <b>G</b> GLRFTAGTWRAN <b>G</b> SGS---AANASREEQIRVAENVLRSQGIRAWPVCGR-RG  |
|                                | 292 302 312 322 332 342 352                                                                                        |



Figure S5

(A)

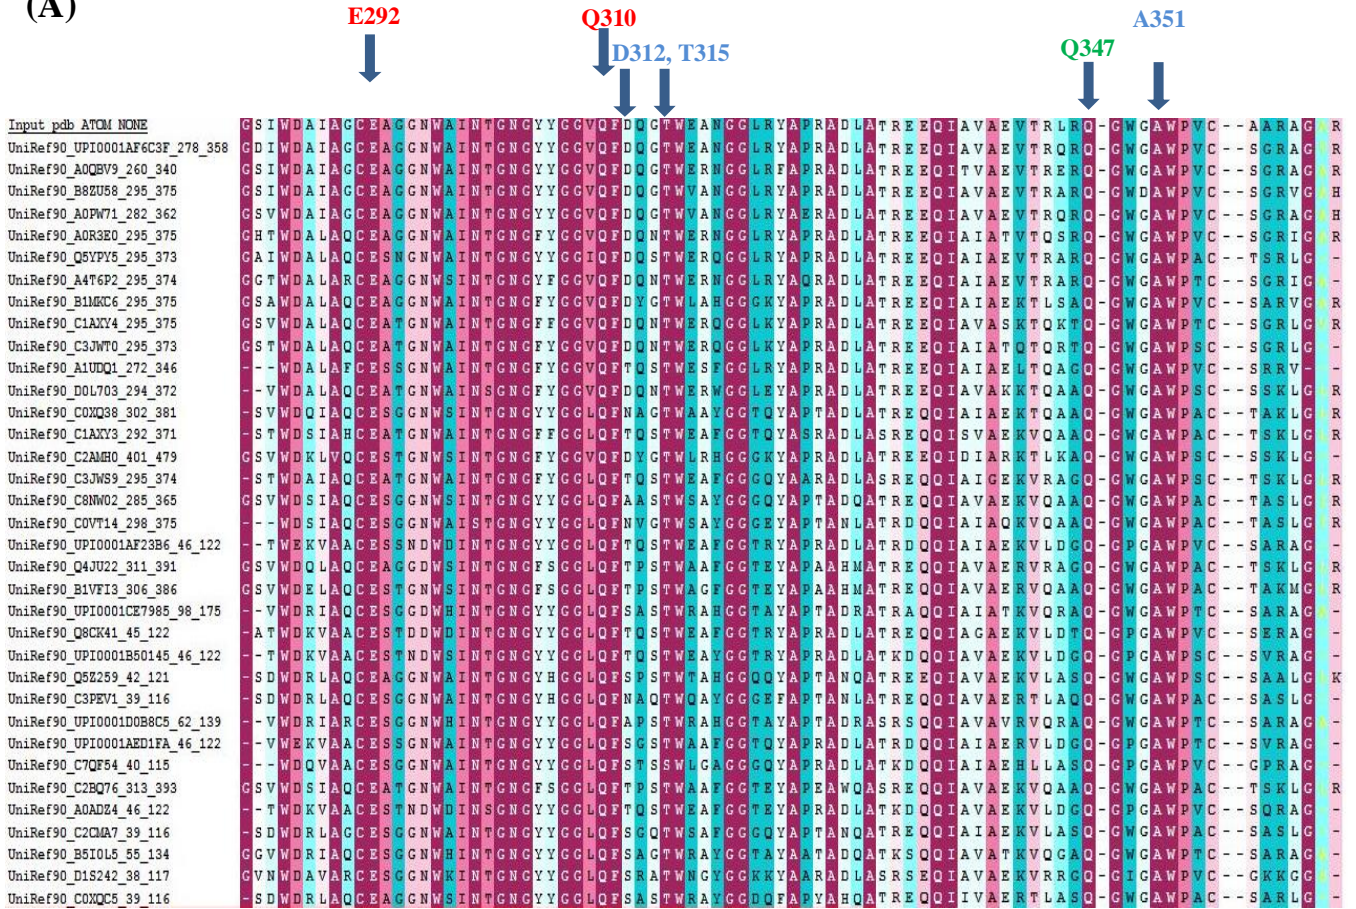

(B)

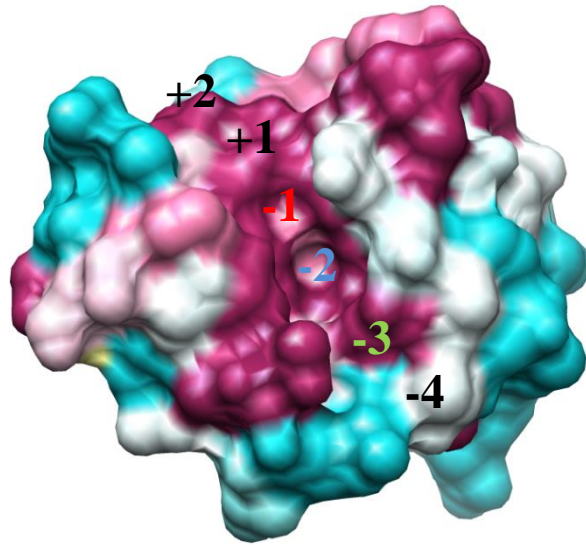

Figure S6

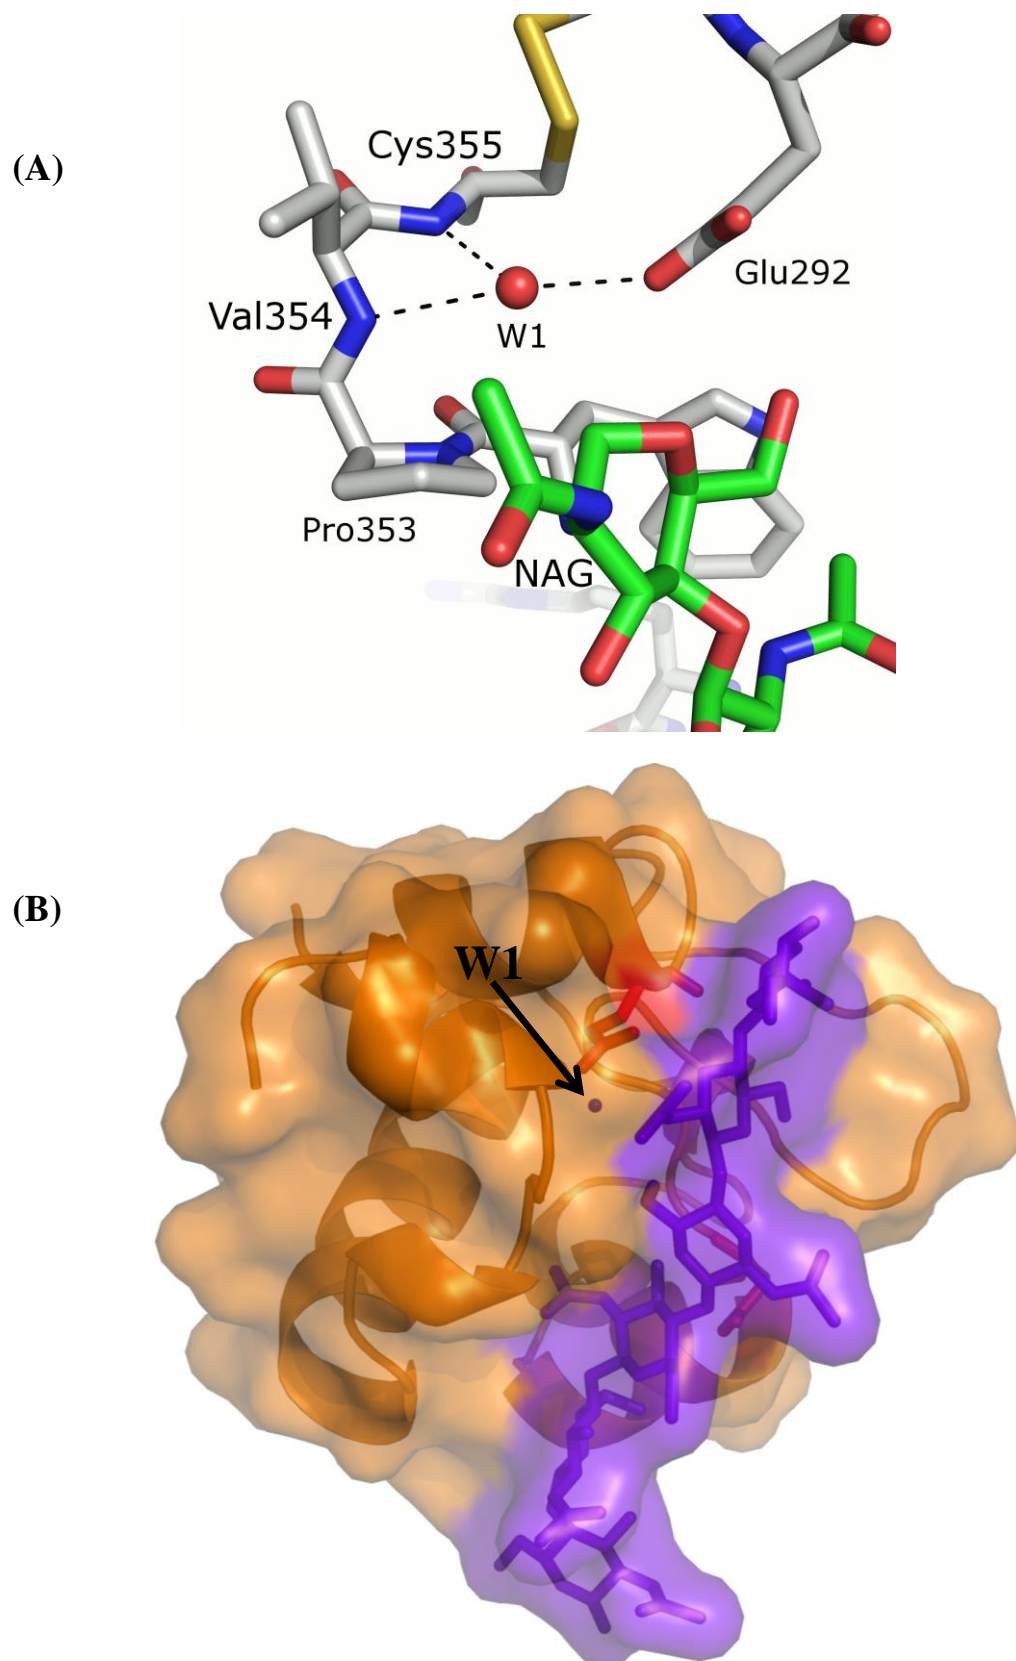



Figure S7

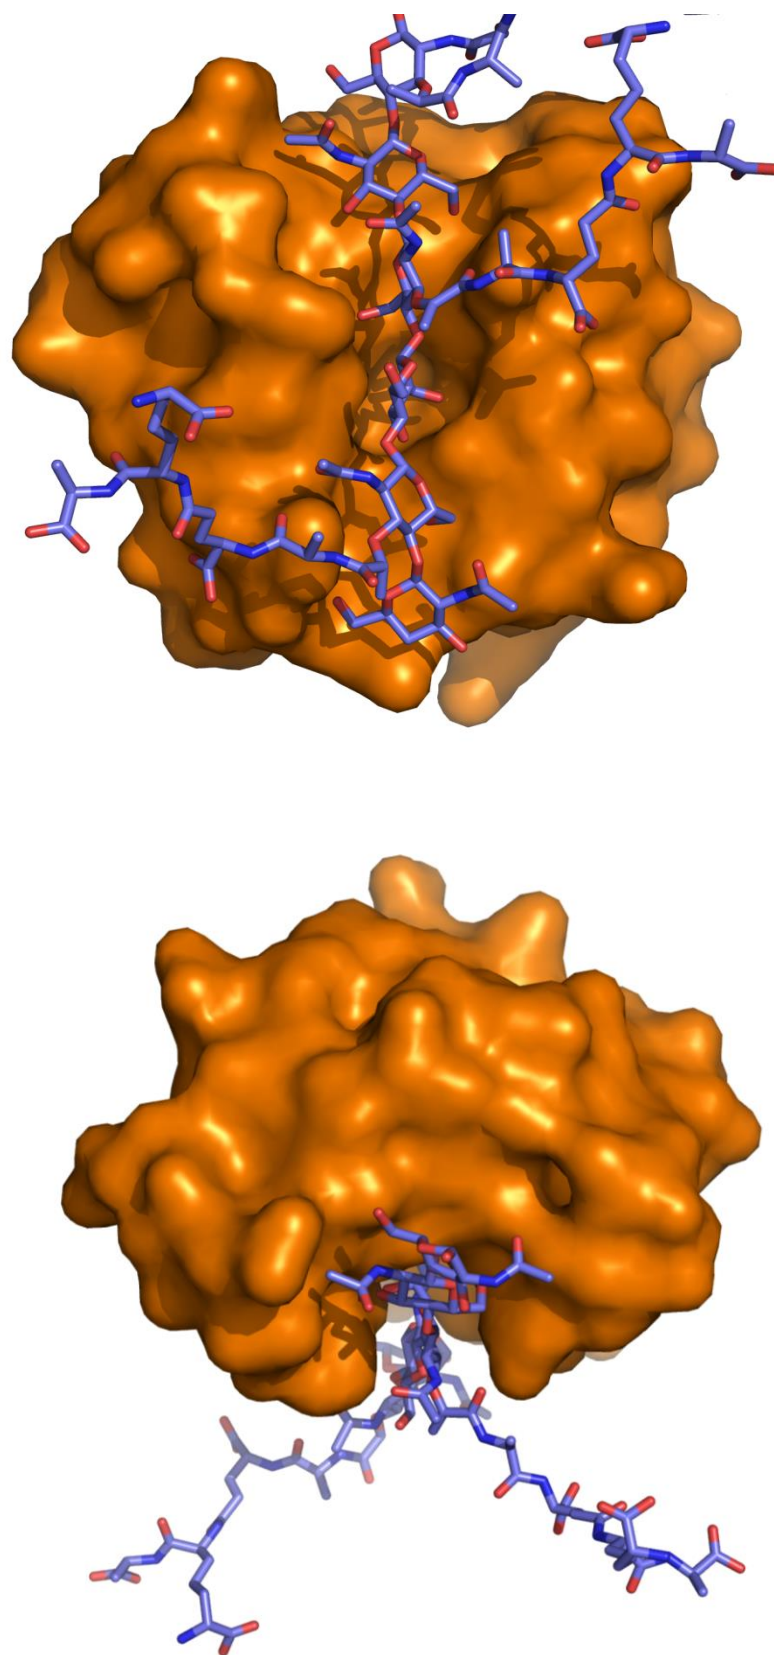

Figure S8

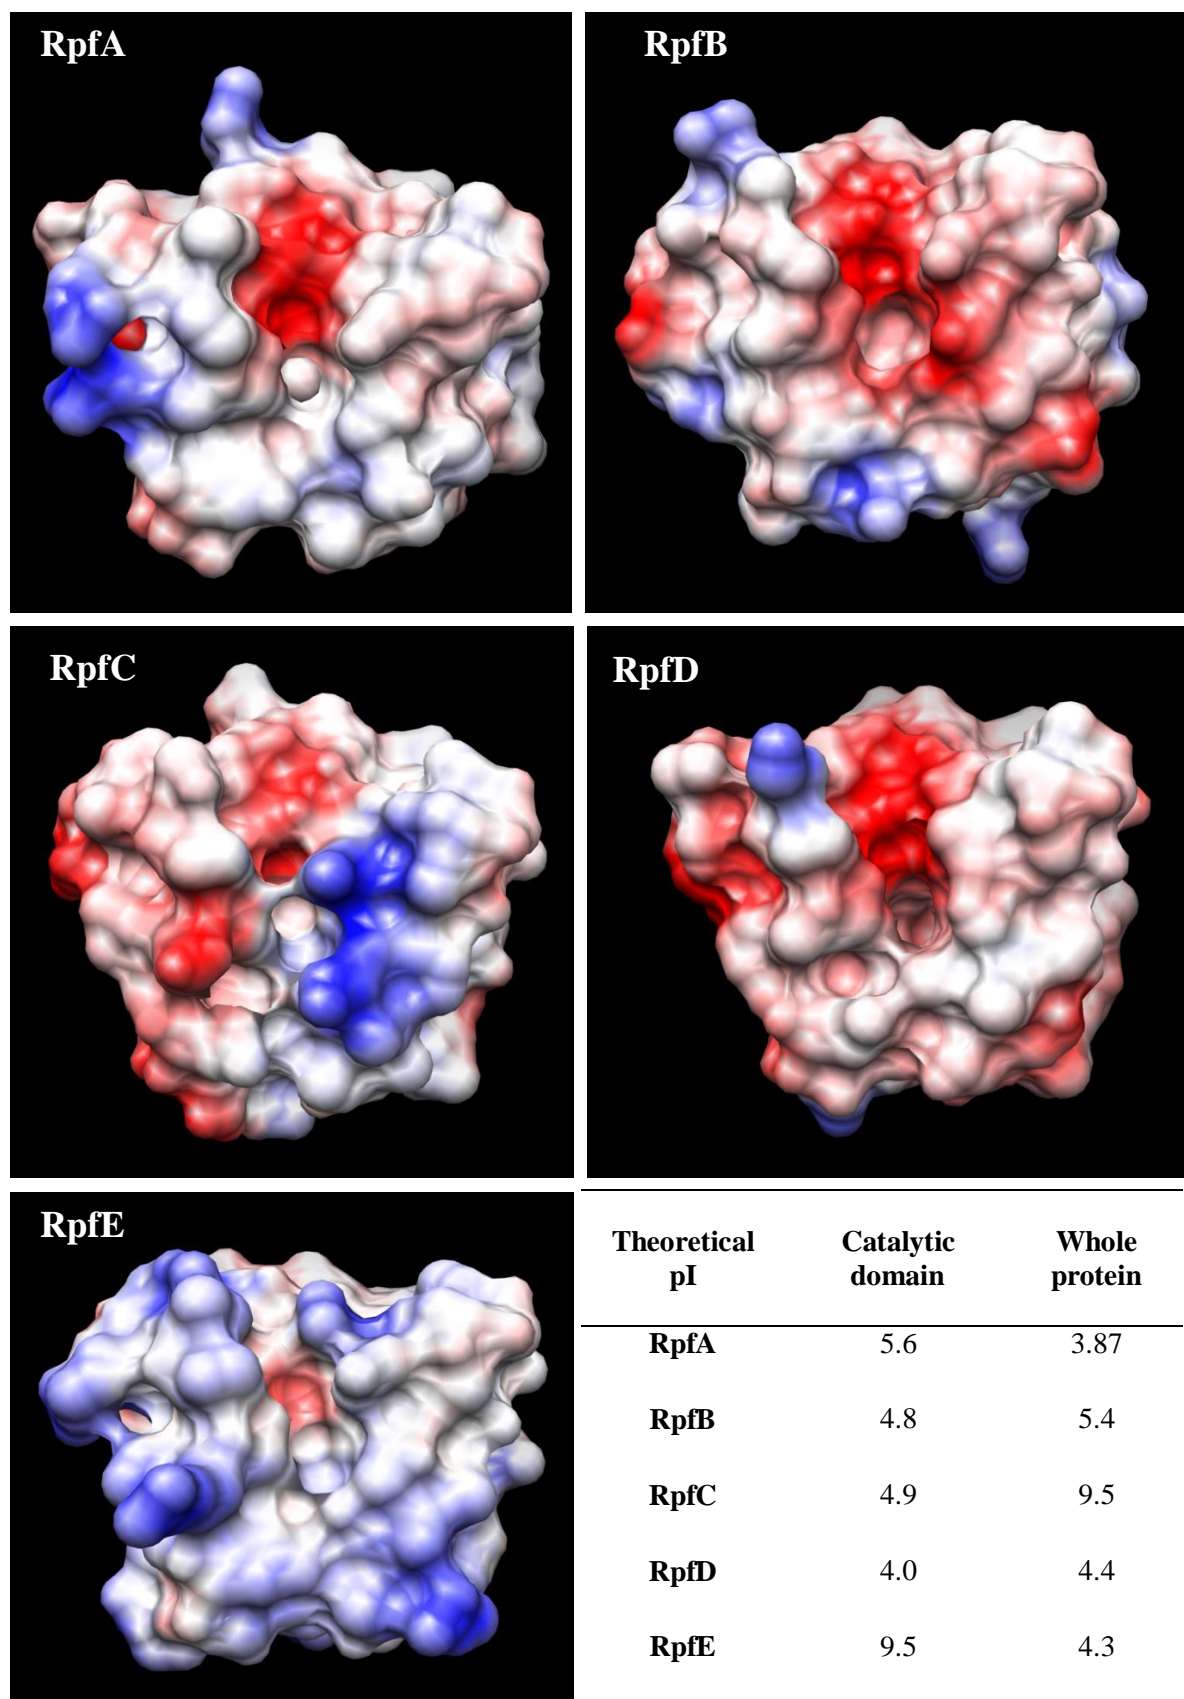

Supplement: mmc1.pdf [file mmc1.pdf]
